# Supplementary material for: Vanadium pentoxide interfacial layer enables high performance all-solid-state thin film batteries
Source: Royal Society of Chemistry journal article supplement (doi:10.1039/d4ra01849d), 2024-01-01
Supplement: d4ra01849d1.pdf [file d4ra01849d1.pdf]

***Vanadium pentoxide interfacial layer enables high-performance all-  
solid-state thin film batteries***

Shiping Ma,<sup>‡a</sup> Kaiyuan Wei,<sup>‡b</sup> Yu Zhao,<sup>a</sup> Jinxu Qiu,<sup>a</sup> Rongrui Xu,<sup>a</sup> Hongliang Li,<sup>a</sup> Hui Zhang<sup>\*c</sup> and Yanhua Cui<sup>\*a</sup>

<sup>a</sup> Laboratory of Electrochemical Power Sources, Institute of Electronic Engineering, China Academy of Engineering Physics, Mianyang, Sichuan 621000, P. R. China

<sup>b</sup> College of Chemistry and Materials Engineering, Anhui Science and Technology University, Bengbu, 233000, P R. China

<sup>c</sup> School of Advanced Materials and Nanotechnology, Xidian University, Xi'an, 710126, P. R. China

<sup>‡</sup> These authors contributed equally to this work.

Corresponding authors

E-mail: [zhanghui@xidian.edu.cn](mailto:zhanghui@xidian.edu.cn) (H. Zhang), [cuiyanhua@netease.com](mailto:cuiyanhua@netease.com) (Y. Cui)

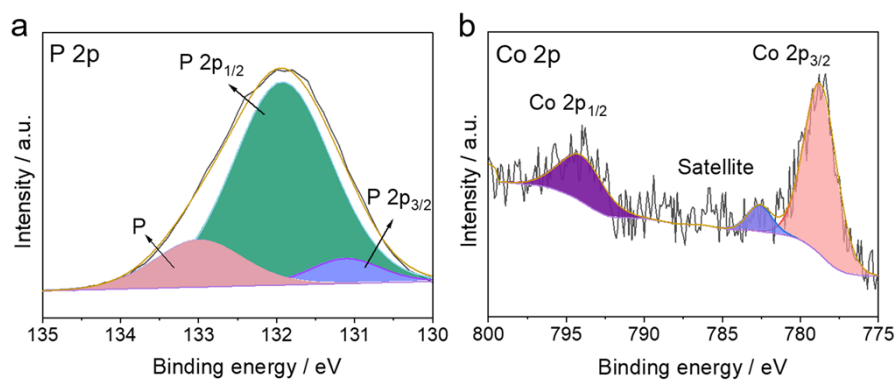

**Figure S1.** High-resolution XPS spectra for elemental (a) P 2p and (b) Co 2p.

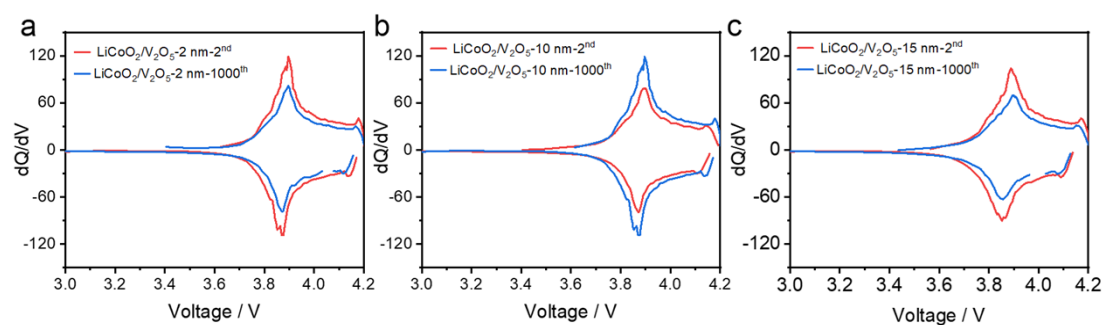

**Figure S2.** The differential capacity ( $dQ/dV$ ) versus voltage derived from the 2nd and 1000th charge-discharge curves of TFBS based on (a)  $\text{LiCoO}_2/\text{V}_2\text{O}_5$ -2 nm/LiPON/Li, (b)  $\text{LiCoO}_2/\text{V}_2\text{O}_5$ -10 nm/LiPON/Li and (c)  $\text{LiCoO}_2/\text{V}_2\text{O}_5$ -15 nm/LiPON/Li structures.
